# Supplementary material
Source: publisher figshare collection journal article supplement (https://gsapubs.figshare.com/articles/dataset/_/12818762)
Supplement: Supplementary file 1 [file 1]

**A. Tapeats (Northern Arizona)**

**i.**

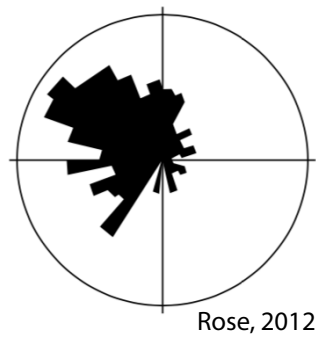

Rose, 2012

**ii.**

**Tilt-corrected paleomagnetic directions with illustrative cross-bedding plane(blue)**

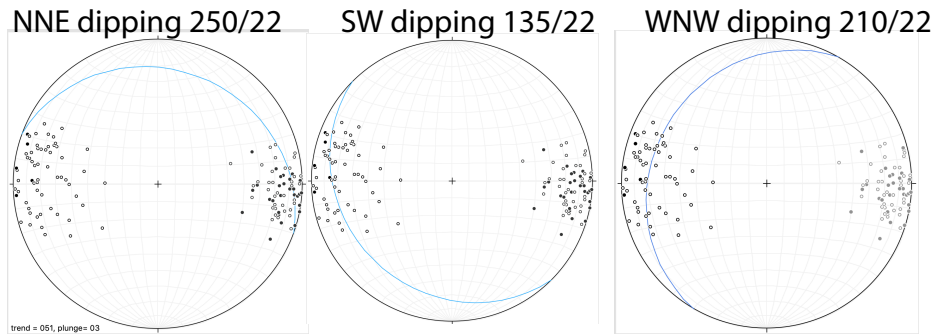

Elston and Bressler, 1977 paleomagnetic directions

**iii.**

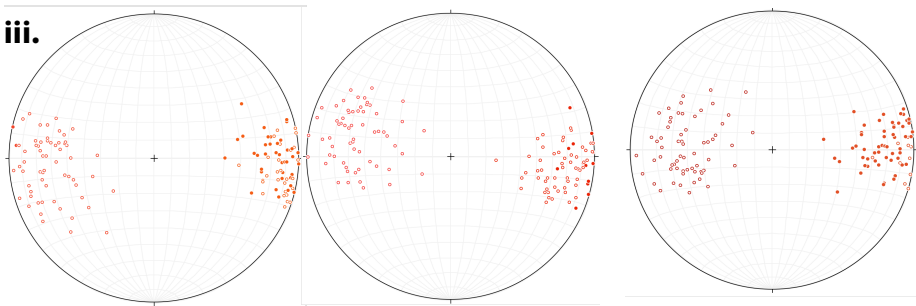

**iv.**

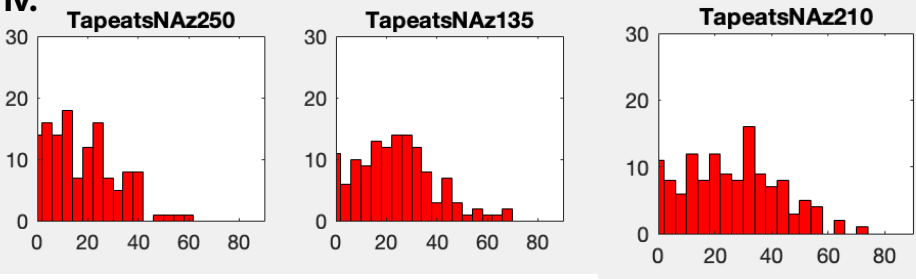

**B. Shinumo (Grand Canyon)**

**i.**

**Cross-bedding dip direction/dip and rose diagram**

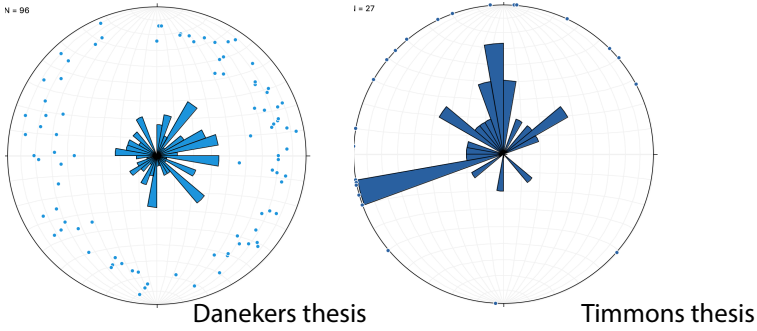

**ii.**

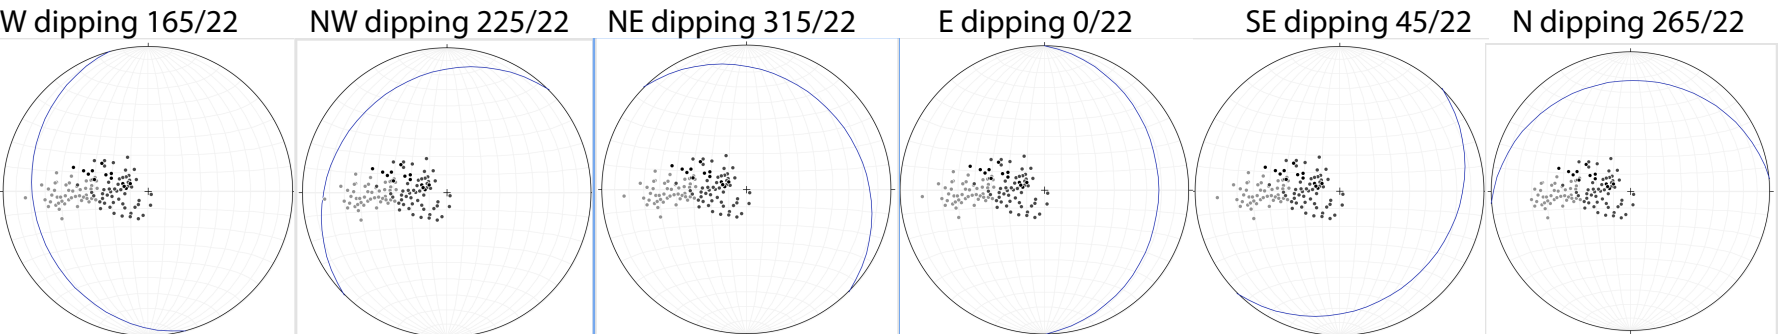

Elston and Gromme, 1994 paleomagnetic directions

**iii.**

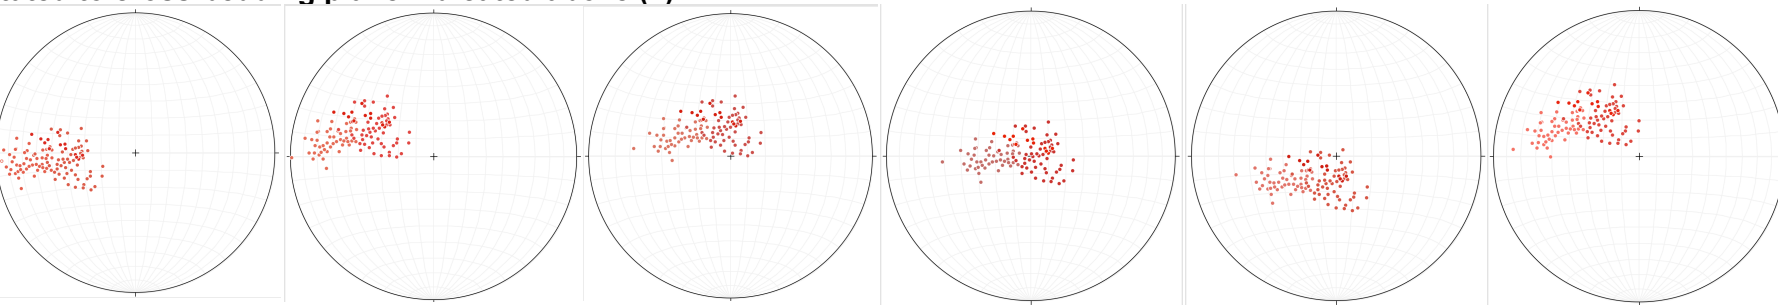

**iv.**

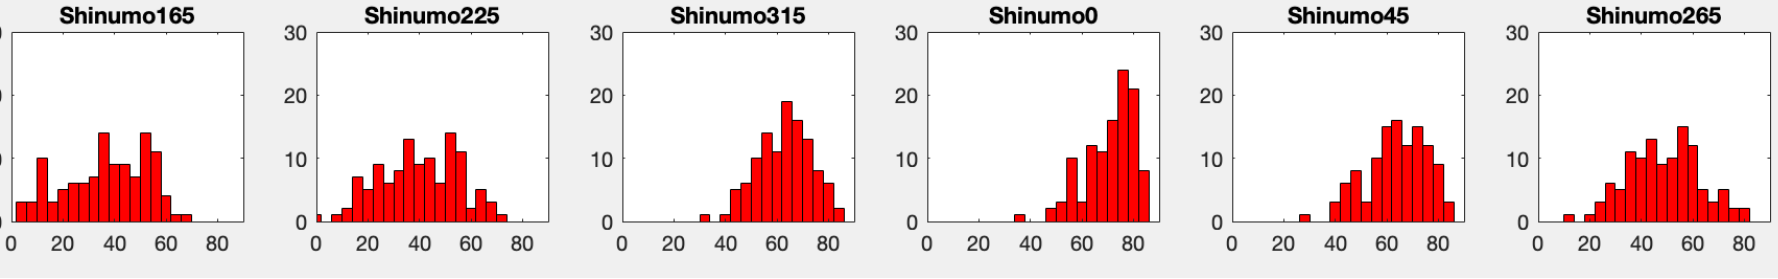

Table S1: Rotations of measured paleomagnetic paleopoles to test the error introduced by measuring inclinations relative to cross bedding of different orientations instead of horizontal bedding.
